# Supplementary material for: Thermal stability of p-type Ag-doped Mg3Sb2 thermoelectric materials investigated by powder X-ray diffraction
Source: Royal Society of Chemistry journal article supplement (doi:10.1039/c8cp07648k), 2019-01-01
Supplement: c8cp07648k1.pdf [file c8cp07648k1.pdf]

## Supporting information

### Thermal stability of *p*-type Ag-doped Mg<sub>3</sub>Sb<sub>2</sub> thermoelectric materials investigated by powder X-ray Diffraction

Lirong Song<sup>a</sup>, Jiawei Zhang<sup>a</sup>, and Bo B. Iversen<sup>a,\*</sup>

<sup>a</sup>Center for Materials Crystallography, Department of Chemistry and iNANO, Aarhus University, DK-8000 Aarhus, Denmark.

\*Corresponding author. E-mail address: [bo@chem.au.dk](mailto:bo@chem.au.dk)

**Table S1.** Rietveld refinement details of in-house *in situ* PXRD data for the as-pressed pellet 1 in two cycles of heating and cooling.

| T(K)_heating                                                     | 303-1                    | 398-1       | 498-1       | 598-1       | 698-1       |             |
|------------------------------------------------------------------|--------------------------|-------------|-------------|-------------|-------------|-------------|
| <i>t</i> <sub>exp.</sub> (min)                                   | 52                       | 52          | 52          | 52          | 52          |             |
| No. of points                                                    | 6573                     | 6573        | 6573        | 6573        | 6573        |             |
| No. of reflections<br>(Mg <sub>3</sub> Sb <sub>2</sub> )         | 69                       | 69          | 69          | 69          | 66          |             |
| No. of parameters                                                | 26                       | 29          | 32          | 29          | 32          |             |
| <i>R</i> <sub>f</sub> (Mg <sub>3</sub> Sb <sub>2</sub> ) (%)     | 6.06                     | 6.41        | 6.46        | 8.04        | 8.46        |             |
| <i>R</i> <sub>Bragg</sub> (Mg <sub>3</sub> Sb <sub>2</sub> ) (%) | 9.95                     | 10.2        | 10.3        | 12.6        | 15.6        |             |
| <i>R</i> <sub>p</sub> (%)                                        | 19.8                     | 20.1        | 19.4        | 19.9        | 21.2        |             |
| <i>R</i> <sub>wp</sub> (%)                                       | 24.5                     | 25.2        | 23.6        | 23.3        | 24.0        |             |
| χ <sup>2</sup>                                                   | 47.2                     | 25.2        | 19.9        | 19.9        | 20.3        |             |
| Wt.% Mg <sub>3</sub> Sb <sub>2</sub>                             | 99.42(0.83)              | 99.26(0.87) | 98.60(0.76) | 97.87(0.76) | 97.17(0.78) |             |
| Wt.% Sb                                                          | 0.58(0.09)               | 0.74(0.09)  | 1.40(0.07)  | 2.13(0.07)  | 2.83(0.07)  |             |
| Mg <sub>3</sub> Sb <sub>2</sub>                                  | <i>a</i> = <i>b</i> (Å)  | 4.56882(16) | 4.57552(17) | 4.57790(13) | 4.58171(11) | 4.58596(10) |
|                                                                  | <i>c</i> (Å)             | 7.23568(29) | 7.24843(30) | 7.25668(23) | 7.26656(20) | 7.27658(17) |
|                                                                  | Volume (Å <sup>3</sup> ) | 130.803(8)  | 131.418(9)  | 131.705(7)  | 132.103(6)  | 132.531(5)  |

| T(K)_cooling                                                     | 598-2 | 498-2 | 398-2 | 343-2 |
|------------------------------------------------------------------|-------|-------|-------|-------|
| <i>t</i> <sub>exp.</sub> (min)                                   | 52    | 52    | 52    | 52    |
| No. of points                                                    | 6573  | 6573  | 6573  | 6573  |
| No. of reflections<br>(Mg <sub>3</sub> Sb <sub>2</sub> )         | 66    | 65    | 65    | 65    |
| No. of parameters                                                | 30    | 29    | 37    | 29    |
| <i>R</i> <sub>f</sub> (Mg <sub>3</sub> Sb <sub>2</sub> ) (%)     | 8.19  | 8.52  | 8.46  | 8.77  |
| <i>R</i> <sub>Bragg</sub> (Mg <sub>3</sub> Sb <sub>2</sub> ) (%) | 13.6  | 13.8  | 12.9  | 14.2  |
| <i>R</i> <sub>p</sub> (%)                                        | 21.3  | 20.9  | 19.9  | 20.8  |

|                                      |                          |             |             |             |
|--------------------------------------|--------------------------|-------------|-------------|-------------|
| $R_{wp}$ (%)                         | 24.4                     | 24.3        | 23.7        | 24.5        |
| $\chi^2$                             | 22.0                     | 23.2        | 24.1        | 26.1        |
| Wt.% Mg <sub>3</sub> Sb <sub>2</sub> | 96.46(0.78)              | 96.45(0.77) | 95.43(0.76) | 96.39(0.78) |
| Wt.% Sb                              | 3.54(0.08)               | 3.55(0.08)  | 4.57(0.10)  | 3.61(0.09)  |
| Mg <sub>3</sub> Sb <sub>2</sub>      | $a=b$ (Å)                | 4.57982 (9) | 4.57373(9)  | 4.56788(9)  |
|                                      | $c$ (Å)                  | 7.26490(17) | 7.25301(17) | 7.24161(17) |
|                                      | Volume (Å <sup>3</sup> ) | 131.964(5)  | 131.398(5)  | 130.857(5)  |

|                                                          |                             |             |             |             |
|----------------------------------------------------------|-----------------------------|-------------|-------------|-------------|
| $T(K)$ _heating                                          | 398-3                       | 498-3       | 598-3       | 698-3       |
| $t_{exp.}$ (min)                                         | 52                          | 52          | 52          | 52          |
| No. of points                                            | 6573                        | 6573        | 6573        | 6573        |
| No. of reflections<br>(Mg <sub>3</sub> Sb <sub>2</sub> ) | 65                          | 66          | 65          | 66          |
| No. of parameters                                        | 39                          | 30          | 33          | 31          |
| $R_f$ (Mg <sub>3</sub> Sb <sub>2</sub> ) (%)             | 8.20                        | 8.51        | 7.94        | 8.60        |
| $R_{Bragg}$ (Mg <sub>3</sub> Sb <sub>2</sub> ) (%)       | 12.9                        | 14.2        | 13.4        | 14.3        |
| $R_p$ (%)                                                | 19.8                        | 21.4        | 21.2        | 21.1        |
| $R_{wp}$ (%)                                             | 23.5                        | 24.8        | 24.3        | 23.9        |
| $\chi^2$                                                 | 24.1                        | 24.3        | 22.5        | 21.0        |
| Wt.% Mg <sub>3</sub> Sb <sub>2</sub>                     | 95.44(0.75)                 | 96.40(0.79) | 96.54(0.78) | 96.73(0.77) |
| Wt.% Sb                                                  | 4.56(0.10)                  | 3.60(0.09)  | 3.46(0.08)  | 3.27(0.08)  |
| Mg <sub>3</sub> Sb <sub>2</sub>                          | $a=b$ (Å)                   | 4.56781(9)  | 4.57394(9)  | 4.58002(9)  |
|                                                          | $c$ (Å)                     | 7.24151(16) | 7.25347(17) | 7.26492(16) |
|                                                          | Volume<br>(Å <sup>3</sup> ) | 130.851(5)  | 131.419(5)  | 131.976(5)  |

|                                                          |                             |             |             |             |
|----------------------------------------------------------|-----------------------------|-------------|-------------|-------------|
| $T(K)$ _cooling                                          | 598-4                       | 498-4       | 398-4       | 303-4       |
| $t_{exp.}$ (min)                                         | 52                          | 52          | 52          | 52          |
| No. of points                                            | 6573                        | 6573        | 6573        | 6573        |
| No. of reflections<br>(Mg <sub>3</sub> Sb <sub>2</sub> ) | 65                          | 65          | 65          | 65          |
| No. of parameters                                        | 29                          | 32          | 38          | 38          |
| $R_f$ (Mg <sub>3</sub> Sb <sub>2</sub> ) (%)             | 8.21                        | 8.43        | 8.51        | 8.65        |
| $R_{Bragg}$ (Mg <sub>3</sub> Sb <sub>2</sub> ) (%)       | 13.6                        | 14.8        | 13.2        | 14.1        |
| $R_p$ (%)                                                | 21.5                        | 21.6        | 20.4        | 21.9        |
| $R_{wp}$ (%)                                             | 24.7                        | 24.9        | 24.1        | 25.6        |
| $\chi^2$                                                 | 23.1                        | 24.6        | 25.5        | 29.0        |
| Wt.% Mg <sub>3</sub> Sb <sub>2</sub>                     | 96.28(0.78)                 | 96.26(0.80) | 95.18(0.77) | 95.91(0.82) |
| Wt.% Sb                                                  | 3.72(0.08)                  | 3.74(0.09)  | 4.82(0.11)  | 4.09(0.10)  |
| Mg <sub>3</sub> Sb <sub>2</sub>                          | $a=b$ (Å)                   | 4.57970(9)  | 4.57362(9)  | 4.56768(9)  |
|                                                          | $c$ (Å)                     | 7.26473(17) | 7.25281(17) | 7.24141(17) |
|                                                          | Volume<br>(Å <sup>3</sup> ) | 131.954(5)  | 131.388(5)  | 130.841(5)  |

**Table S2.** Rietveld refinement details of in-house *in situ* PXRD data for the powdered sample (from pellet 2) in two cycles of heating and cooling.

|                                      |                             |                 |                 |                 |                 |                 |                 |
|--------------------------------------|-----------------------------|-----------------|-----------------|-----------------|-----------------|-----------------|-----------------|
| $T(K)$ _heating                      | 303-1                       | 398-1           | 498-1           | 598-1           | 698-1           | 723-1           |                 |
| $t_{exp.}$ (min)                     | 52                          | 52              | 52              | 52              | 52              | 52              |                 |
| No. of points                        | 6573                        | 6573            | 6573            | 6573            | 6573            | 6573            |                 |
| No. of reflections<br>( $Mg_3Sb_2$ ) | 69                          | 71              | 69              | 69              | 69              | 69              |                 |
| No. of parameters                    | 27                          | 23              | 27              | 27              | 30              | 27              |                 |
| $R_f$ ( $Mg_3Sb_2$ ) (%)             | 5.79                        | 6.83            | 5.76            | 6.58            | 6.84            | 6.94            |                 |
| $R_{Bragg}$ ( $Mg_3Sb_2$ ) (%)       | 11.1                        | 16.9            | 10.9            | 11.8            | 11.9            | 12.2            |                 |
| $R_p$ (%)                            | 17.3                        | 17.3            | 17.5            | 18.5            | 19.1            | 19.0            |                 |
| $R_{wp}$ (%)                         | 20.5                        | 20.6            | 21.0            | 21.9            | 22.4            | 22.3            |                 |
| $\chi^2$                             | 14.6                        | 14.8            | 15.0            | 14.7            | 15.6            | 15.3            |                 |
| Wt.% $Mg_3Sb_2$                      | 99.35(0.46)                 | 99.38(0.46)     | 99.13(0.46)     | 97.67(0.69)     | 97.16(0.72)     | 97.01(0.71)     |                 |
| Wt.% Sb                              | 0.65(0.04)                  | 0.62(0.04)      | 0.87(0.05)      | 2.33(0.07)      | 2.84(0.07)      | 2.99(0.07)      |                 |
| $Mg_3Sb_2$                           | $a=b$ (Å)                   | 4.55838<br>(11) | 4.56308<br>(11) | 4.56719<br>(11) | 4.57193<br>(10) | 4.57669<br>(9)  | 4.57782<br>(9)  |
|                                      | $c$ (Å)                     | 7.22769<br>(22) | 7.23736<br>(22) | 7.24531<br>(21) | 7.25388<br>(18) | 7.26312<br>(17) | 7.26539<br>(17) |
|                                      | Volume<br>(Å <sup>3</sup> ) | 130.062(6)      | 130.505(6)      | 130.884(6)      | 131.310(5)      | 131.752(5)      | 131.858(5)      |

|                                      |                          |             |             |             |             |
|--------------------------------------|--------------------------|-------------|-------------|-------------|-------------|
| $T(K)$ _cooling                      | 698-2                    | 598-2       | 498-2       | 343-2       |             |
| $t_{exp.}$ (min)                     | 52                       | 52          | 52          | 52          |             |
| No. of points                        | 6573                     | 6573        | 6573        | 6573        |             |
| No. of reflections<br>( $Mg_3Sb_2$ ) | 69                       | 69          | 67          | 67          |             |
| No. of parameters                    | 31                       | 29          | 31          | 30          |             |
| $R_f$ ( $Mg_3Sb_2$ ) (%)             | 7.05                     | 6.82        | 6.80        | 7.09        |             |
| $R_{Bragg}$ ( $Mg_3Sb_2$ ) (%)       | 12.1                     | 12.2        | 11.6        | 12.4        |             |
| $R_p$ (%)                            | 18.7                     | 18.7        | 18.1        | 18.0        |             |
| $R_{wp}$ (%)                         | 22.1                     | 21.7        | 21.5        | 21.2        |             |
| $\chi^2$                             | 15.0                     | 15.4        | 15.5        | 16.2        |             |
| Wt.% $Mg_3Sb_2$                      | 97.00(0.71)              | 96.83(0.69) | 96.85(0.69) | 96.37(0.45) |             |
| Wt.% Sb                              | 3.00(0.07)               | 3.17(0.07)  | 3.15(0.07)  | 3.63(0.08)  |             |
| $Mg_3Sb_2$                           | $a=b$ (Å)                | 4.57702(9)  | 4.57235(8)  | 4.56765(8)  | 4.56051(8)  |
|                                      | $c$ (Å)                  | 7.26368(16) | 7.25387(15) | 7.24477(15) | 7.23027(15) |
|                                      | Volume (Å <sup>3</sup> ) | 131.781(5)  | 131.335(4)  | 130.900(4)  | 130.230(4)  |

|                 |       |       |       |       |       |
|-----------------|-------|-------|-------|-------|-------|
| $T(K)$ _heating | 398-3 | 498-3 | 598-3 | 698-3 | 723-3 |
|-----------------|-------|-------|-------|-------|-------|

|                                                           |                          |             |             |             |             |             |
|-----------------------------------------------------------|--------------------------|-------------|-------------|-------------|-------------|-------------|
| $t_{\text{exp.}}$ (min)                                   | 52                       | 52          | 52          | 52          | 52          |             |
| No. of points                                             | 6573                     | 6573        | 6573        | 6573        | 6573        |             |
| No. of reflections<br>(Mg <sub>3</sub> Sb <sub>2</sub> )  | 67                       | 67          | 69          | 69          | 69          |             |
| No. of parameters                                         | 34                       | 27          | 32          | 32          | 32          |             |
| $R_f$ (Mg <sub>3</sub> Sb <sub>2</sub> ) (%)              | 6.87                     | 7.08        | 6.50        | 6.82        | 7.38        |             |
| $R_{\text{Bragg}}$ (Mg <sub>3</sub> Sb <sub>2</sub> ) (%) | 12.4                     | 12.5        | 11.3        | 11.6        | 12.8        |             |
| $R_p$ (%)                                                 | 18.1                     | 18.7        | 18.2        | 18.6        | 19.0        |             |
| $R_{\text{wp}}$ (%)                                       | 21.3                     | 22.1        | 21.5        | 21.9        | 22.2        |             |
| $\chi^2$                                                  | 15.7                     | 16.1        | 14.6        | 14.5        | 14.8        |             |
| Wt.% Mg <sub>3</sub> Sb <sub>2</sub>                      | 96.18(0.44)              | 96.82(0.70) | 96.92(0.68) | 96.97(0.70) | 96.93(0.71) |             |
| Wt.% Sb                                                   | 3.82(0.08)               | 3.18(0.07)  | 3.08(0.07)  | 3.03(0.07)  | 3.07(0.07)  |             |
| Mg <sub>3</sub> Sb <sub>2</sub>                           | $a=b$ (Å)                | 4.56329(8)  | 4.56756(8)  | 4.57224(8)  | 4.57705(9)  | 4.57814(8)  |
|                                                           | $c$ (Å)                  | 7.23555(15) | 7.24504(16) | 7.25397(15) | 7.26375(16) | 7.26556(16) |
|                                                           | Volume (Å <sup>3</sup> ) | 130.484(4)  | 130.900(4)  | 131.330(4)  | 131.784(5)  | 131.880(4)  |

|                                                           |                          |             |             |             |             |             |
|-----------------------------------------------------------|--------------------------|-------------|-------------|-------------|-------------|-------------|
| $T(K)_{\text{cooling}}$                                   | 698-4                    | 598-4       | 498-4       | 398-4       | 308-4       |             |
| $t_{\text{exp.}}$ (min)                                   | 52                       | 52          | 52          | 52          | 52          |             |
| No. of points                                             | 6573                     | 6573        | 6573        | 6573        | 6573        |             |
| No. of reflections<br>(Mg <sub>3</sub> Sb <sub>2</sub> )  | 69                       | 69          | 67          | 66          | 66          |             |
| No. of parameters                                         | 30                       | 30          | 29          | 29          | 29          |             |
| $R_f$ (Mg <sub>3</sub> Sb <sub>2</sub> ) (%)              | 6.87                     | 7.27        | 7.03        | 7.15        | 7.47        |             |
| $R_{\text{Bragg}}$ (Mg <sub>3</sub> Sb <sub>2</sub> ) (%) | 11.7                     | 12.6        | 12.6        | 12.6        | 13.2        |             |
| $R_p$ (%)                                                 | 18.6                     | 19.1        | 18.7        | 18.5        | 18.7        |             |
| $R_{\text{wp}}$ (%)                                       | 21.8                     | 22.2        | 21.8        | 21.4        | 22.2        |             |
| $\chi^2$                                                  | 14.3                     | 15.3        | 15.4        | 15.5        | 16.2        |             |
| Wt.% Mg <sub>3</sub> Sb <sub>2</sub>                      | 96.70(0.70)              | 96.66(0.71) | 96.50(0.69) | 95.88(0.45) | 96.62(0.46) |             |
| Wt.% Sb                                                   | 3.30(0.07)               | 3.34(0.07)  | 3.50(0.08)  | 4.12(0.09)  | 3.38(0.07)  |             |
| Mg <sub>3</sub> Sb <sub>2</sub>                           | $a=b$ (Å)                | 4.57725(8)  | 4.57250(8)  | 4.56795(8)  | 4.56337(8)  | 4.55886(8)  |
|                                                           | $c$ (Å)                  | 7.26369(15) | 7.25430(15) | 7.24469(15) | 7.23568(14) | 7.22714(15) |
|                                                           | Volume (Å <sup>3</sup> ) | 131.794(4)  | 131.351(4)  | 130.916(4)  | 130.491(4)  | 130.080(4)  |

**Table S3.** Rietveld refinement details of PXRD data at room temperature for pellet 1.

|                                                          |                       |                      |            |               |
|----------------------------------------------------------|-----------------------|----------------------|------------|---------------|
| $T(K)_{\text{@RT}}$                                      | before <i>in situ</i> | after <i>in situ</i> | after Hall | after Seebeck |
| $t_{\text{exp.}}$ (min)                                  | 52                    | 52                   | 52         | 52            |
| No. of points                                            | 6573                  | 6573                 | 6573       | 6573          |
| No. of reflections<br>(Mg <sub>3</sub> Sb <sub>2</sub> ) | 69                    | 65                   | 86         | 86            |
| No. of parameters                                        | 26                    | 38                   | 44         | 41            |
| $R_f$ (Mg <sub>3</sub> Sb <sub>2</sub> ) (%)             | 6.06                  | 8.65                 | 10.1       | 9.22          |

|                                                     |                          |             |             |             |             |
|-----------------------------------------------------|--------------------------|-------------|-------------|-------------|-------------|
| $R_{\text{Bragg}}$ ( $\text{Mg}_3\text{Sb}_2$ ) (%) |                          | 9.95        | 14.1        | 16.8        | 16.5        |
| $R_p$ (%)                                           |                          | 19.8        | 21.9        | 24.2        | 23.2        |
| $R_{\text{wp}}$ (%)                                 |                          | 24.5        | 25.6        | 29.1        | 29.1        |
| $\chi^2$                                            |                          | 47.2        | 29.0        | 57.8        | 52.8        |
| Wt.% $\text{Mg}_3\text{Sb}_2$                       |                          | 99.42(0.83) | 95.91(0.82) | 97.05(0.84) | 96.69(0.83) |
| Wt.% Sb                                             |                          | 0.58(0.09)  | 4.09(0.10)  | 2.95(0.10)  | 3.31(0.10)  |
| $\text{Mg}_3\text{Sb}_2$                            | $a=b$ (Å)                | 4.56882(16) | 4.56080(9)  | 4.56640(4)  | 4.56610(5)  |
|                                                     | $c$ (Å)                  | 7.23568(29) | 7.22834(17) | 7.23878(8)  | 7.23773(9)  |
|                                                     | Volume (Å <sup>3</sup> ) | 130.803(8)  | 130.212(5)  | 130.720(2)  | 130.684(2)  |

**Table S4.** Rietveld refinement details of multi-temperature synchrotron PXRD data for the powdered sample (from pellet 2) before in-house powder *in situ* PXRD measurements.

|                                                     |                             |                 |                 |                 |                 |                 |                 |                |                |
|-----------------------------------------------------|-----------------------------|-----------------|-----------------|-----------------|-----------------|-----------------|-----------------|----------------|----------------|
| $T(\text{K})_{\text{heating}}$                      | 300                         | 400             | 500             | 600             | 650             | 700             | 730             |                |                |
| $t_{\text{exp}}$ (min)                              | 5                           | 5               | 5               | 5               | 5               | 5               | 5               |                |                |
| No. of points                                       | 7728                        | 7728            | 7727            | 7727            | 7726            | 7726            | 7726            |                |                |
| No. of reflections<br>( $\text{Mg}_3\text{Sb}_2$ )  | 1024                        | 1044            | 972             | 957             | 972             | 967             | 948             |                |                |
| No. of parameters                                   | 58                          | 50              | 44              | 55              | 52              | 56              | 59              |                |                |
| $R_f$ ( $\text{Mg}_3\text{Sb}_2$ ) (%)              | 1.97                        | 2.65            | 3.84            | 4.59            | 4.34            | 6.56            | 7.47            |                |                |
| $R_{\text{Bragg}}$ ( $\text{Mg}_3\text{Sb}_2$ ) (%) | 6.00                        | 16.4            | 6.35            | 3.92            | 3.60            | 8.28            | 9.80            |                |                |
| $R_p$ (%)                                           | 8.12                        | 8.71            | 9.93            | 11.3            | 11.7            | 11.6            | 10.6            |                |                |
| $R_{\text{wp}}$ (%)                                 | 11.0                        | 11.4            | 12.4            | 13.5            | 13.5            | 13.0            | 11.9            |                |                |
| $\chi^2$                                            | 6.18                        | 6.41            | 7.20            | 8.24            | 8.17            | 7.47            | 6.24            |                |                |
| Wt.% $\text{Mg}_3\text{Sb}_2$                       | 95.43<br>(1.20)             | 93.44<br>(1.21) | 90.68<br>(1.20) | 88.04<br>(1.26) | 86.13<br>(1.23) | 84.23<br>(1.17) | 84.49<br>(1.08) |                |                |
| Wt.% Sb                                             | 1.27<br>(0.04)              | 1.72<br>(0.05)  | 4.11<br>(0.06)  | 5.79<br>(0.07)  | 7.01<br>(0.08)  | 8.18<br>(0.09)  | 9.06<br>(0.09)  |                |                |
| Wt.% MgO                                            | 3.30<br>(0.13)              | 4.84<br>(0.15)  | 5.21<br>(0.16)  | 6.18<br>(0.19)  | 6.86<br>(0.20)  | 7.59<br>(0.20)  | 6.45<br>(0.17)  |                |                |
| $\text{Mg}_3\text{Sb}_2$                            | $a=b$ (Å)                   | 4.56449<br>(9)  | 4.57289<br>(9)  | 4.58097<br>(8)  | 4.58903<br>(7)  | 4.59316<br>(5)  | 4.59687<br>(5)  | 4.59892<br>(4) |                |
|                                                     | $c$ (Å)                     | 7.23590<br>(16) | 7.25312<br>(16) | 7.26843<br>(13) | 7.28431<br>(13) | 7.29243<br>(10) | 7.30006<br>(9)  | 7.30448<br>(7) |                |
|                                                     | Volume<br>(Å <sup>3</sup> ) | 130.559<br>(5)  | 131.352<br>(5)  | 132.095<br>(4)  | 132.850<br>(4)  | 133.238<br>(3)  | 133.592<br>(2)  | 133.792<br>(2) |                |
|                                                     | $B_{\text{iso}}$            | Mg1             | 0.948<br>(152)  | 0.757<br>(153)  | 1.468<br>(156)  | 1.991<br>(174)  | 2.405<br>(187)  | 3.122<br>(199) | 3.356<br>(187) |
|                                                     |                             | Mg2             | 0.787<br>(73)   | 1.418<br>(83)   | 1.846<br>(85)   | 2.492<br>(99)   | 2.801<br>(104)  | 2.936<br>(104) | 3.033<br>(95)  |
|                                                     |                             | Sb1             | 0.723<br>(16)   | 1.033<br>(19)   | 1.524<br>(19)   | 1.967<br>(23)   | 2.012<br>(24)   | 2.266<br>(23)  | 2.503<br>(22)  |

|                                      |                          |             |             |             |             |            |            |
|--------------------------------------|--------------------------|-------------|-------------|-------------|-------------|------------|------------|
| $T(K)_{cooling}$                     | 700                      | 600         | 500         | 400         | 300         |            |            |
| $t_{exp.}(min)$                      | 5                        | 5           | 5           | 5           | 5           |            |            |
| No. of points                        | 7725                     | 7725        | 7725        | 7724        | 7724        |            |            |
| No. of reflections<br>( $Mg_3Sb_2$ ) | 957                      | 933         | 931         | 9202        | 916         |            |            |
| No. of parameters                    | 50                       | 48          | 49          | 44          | 49          |            |            |
| $R_f$ ( $Mg_3Sb_2$ ) (%)             | 6.43                     | 5.45        | 4.00        | 3.55        | 2.29        |            |            |
| $R_{Bragg}$ ( $Mg_3Sb_2$ ) (%)       | 6.42                     | 7.27        | 4.51        | 5.04        | 5.55        |            |            |
| $R_p$ (%)                            | 11.0                     | 10.6        | 10.7        | 10.3        | 8.93        |            |            |
| $R_{wp}$ (%)                         | 12.6                     | 12.2        | 12.3        | 12.2        | 11.2        |            |            |
| $\chi^2$                             | 8.14                     | 8.84        | 9.33        | 10.5        | 8.83        |            |            |
| Wt.% $Mg_3Sb_2$                      | 84.01(1.21)              | 83.62(1.18) | 82.69(1.14) | 82.98(1.14) | 83.88(0.99) |            |            |
| Wt.% Sb                              | 9.69(0.11)               | 9.67(0.10)  | 9.46(0.10)  | 9.56(0.10)  | 9.31(0.09)  |            |            |
| Wt.% MgO                             | 6.30(0.18)               | 6.70(0.19)  | 7.85(0.20)  | 7.46(0.20)  | 6.82(0.16)  |            |            |
| $Mg_3Sb_2$                           | $a=b$ (Å)                | 4.59658(4)  | 4.58861(4)  | 4.58056(4)  | 4.57224(4)  | 4.56360(3) |            |
|                                      | $c$ (Å)                  | 7.29955(8)  | 7.28311(8)  | 7.26691(7)  | 7.25031(7)  | 7.23316(6) |            |
|                                      | Volume (Å <sup>3</sup> ) | 133.566(2)  | 132.803(2)  | 132.044(2)  | 131.264(2)  | 130.459(2) |            |
|                                      | $B_{iso}$                | Mg1         | 3.547(211)  | 2.980(192)  | 2.141(161)  | 1.763(152) | 1.065(112) |
|                                      |                          | Mg2         | 2.437(100)  | 2.235(92)   | 1.817(84)   | 1.364(75)  | 0.968(57)  |
|                                      |                          | Sb1         | 2.357(23)   | 1.994(21)   | 1.536(18)   | 1.131(16)  | 0.718(11)  |

**Table S5.** Rietveld refinement details of multi-temperature synchrotron PXRD data for the powdered sample (from pellet 2) after in-house powder *in situ* PXRD measurements.

|                                      |                 |                 |                 |                 |                 |                 |                 |
|--------------------------------------|-----------------|-----------------|-----------------|-----------------|-----------------|-----------------|-----------------|
| $T(K)_{heating}$                     | 300             | 400             | 500             | 600             | 650             | 700             | 730             |
| $t_{exp.}(min)$                      | 5               | 5               | 5               | 5               | 5               | 5               | 5               |
| No. of points                        | 7727            | 7727            | 7727            | 7727            | 7727            | 7727            | 7726            |
| No. of reflections<br>( $Mg_3Sb_2$ ) | 924             | 936             | 993             | 955             | 967             | 946             | 944             |
| No. of parameters                    | 56              | 54              | 51              | 44              | 51              | 52              | 50              |
| $R_f$ ( $Mg_3Sb_2$ ) (%)             | 3.56            | 4.21            | 3.53            | 5.91            | 5.58            | 8.99            | 8.67            |
| $R_{Bragg}$ ( $Mg_3Sb_2$ ) (%)       | 13.7            | 10.9            | 7.81            | 14.5            | 12.5            | 9.01            | 7.91            |
| $R_p$ (%)                            | 9.60            | 10.0            | 12.2            | 10.9            | 11.4            | 11.2            | 11.2            |
| $R_{wp}$ (%)                         | 12.1            | 12.3            | 14.6            | 12.7            | 13.1            | 12.8            | 12.5            |
| $\chi^2$                             | 9.16            | 8.87            | 10.8            | 8.40            | 8.75            | 8.27            | 8.00            |
| Wt.% $Mg_3Sb_2$                      | 90.32<br>(1.26) | 90.46<br>(1.30) | 89.82<br>(1.50) | 89.33<br>(1.32) | 88.85<br>(1.35) | 86.59<br>(1.31) | 84.28<br>(1.25) |
| Wt.% Sb                              | 5.53<br>(0.07)  | 5.69<br>(0.07)  | 6.04<br>(0.09)  | 5.89<br>(0.08)  | 6.60<br>(0.09)  | 7.93<br>(0.10)  | 9.58<br>(0.11)  |

|                                 |                          |                |                |                 |                 |                 |                |                |                |
|---------------------------------|--------------------------|----------------|----------------|-----------------|-----------------|-----------------|----------------|----------------|----------------|
| Wt.% MgO                        |                          | 4.14<br>(0.16) | 3.84<br>(0.16) | 4.15<br>(0.19)  | 4.77<br>(0.18)  | 4.55<br>(0.20)  | 5.48<br>(0.21) | 6.14<br>(0.21) |                |
| Mg <sub>3</sub> Sb <sub>2</sub> | <i>a=b</i> (Å)           | 4.56488<br>(4) | 4.57320<br>(5) | 4.58143<br>(6)  | 4.58914<br>(5)  | 4.59311<br>(5)  | 4.59671<br>(5) | 4.59898<br>(4) |                |
|                                 | <i>c</i> (Å)             | 7.23518<br>(8) | 7.25180<br>(9) | 7.26809<br>(11) | 7.28388<br>(10) | 7.29200<br>(10) | 7.29961<br>(9) | 7.30437<br>(8) |                |
|                                 | Volume (Å <sup>3</sup> ) | 130.568<br>(2) | 131.346<br>(2) | 132.115<br>(3)  | 132.848<br>(3)  | 133.226<br>(3)  | 133.575<br>(3) | 133.794<br>(2) |                |
|                                 | <i>B</i> <sub>iso</sub>  | Mg1            | 1.070<br>(131) | 1.370<br>(150)  | 1.620<br>(196)  | 2.893<br>(197)  | 2.649<br>(206) | 3.235<br>(218) | 3.537<br>(226) |
|                                 |                          | Mg2            | 0.876<br>(67)  | 1.331<br>(77)   | 1.288<br>(98)   | 2.103<br>(95)   | 2.254<br>(103) | 2.563<br>(109) | 2.790<br>(108) |
| Sb1                             |                          | 0.712<br>(13)  | 1.117<br>(17)  | 1.292<br>(22)   | 1.900<br>(22)   | 2.068<br>(24)   | 2.379<br>(25)  | 2.506<br>(25)  |                |

|                                                                  |                          |             |             |             |             |            |            |
|------------------------------------------------------------------|--------------------------|-------------|-------------|-------------|-------------|------------|------------|
| <i>T</i> (K)_cooling                                             | 700                      | 600         | 500         | 400         | 300         |            |            |
| <i>t</i> <sub>exp.</sub> (min)                                   | 5                        | 5           | 5           | 5           | 5           |            |            |
| No. of points                                                    | 7726                     | 7726        | 7726        | 7726        | 7726        |            |            |
| No. of reflections<br>(Mg <sub>3</sub> Sb <sub>2</sub> )         | 938                      | 933         | 922         | 918         | 916         |            |            |
| No. of parameters                                                | 49                       | 50          | 48          | 41          | 54          |            |            |
| <i>R</i> <sub>f</sub> (Mg <sub>3</sub> Sb <sub>2</sub> ) (%)     | 7.05                     | 5.48        | 4.34        | 4.45        | 2.44        |            |            |
| <i>R</i> <sub>Bragg</sub> (Mg <sub>3</sub> Sb <sub>2</sub> ) (%) | 6.23                     | 5.55        | 5.22        | 4.96        | 6.26        |            |            |
| <i>R</i> <sub>p</sub> (%)                                        | 11.2                     | 11.0        | 10.6        | 10.4        | 9.57        |            |            |
| <i>R</i> <sub>wp</sub> (%)                                       | 12.6                     | 12.8        | 12.4        | 12.2        | 11.7        |            |            |
| $\chi^2$                                                         | 8.31                     | 9.02        | 9.24        | 10.0        | 10.3        |            |            |
| Wt.% Mg <sub>3</sub> Sb <sub>2</sub>                             | 82.30(1.21)              | 82.87(1.22) | 82.95(1.18) | 83.08(1.17) | 84.21(1.14) |            |            |
| Wt.% Sb                                                          | 10.01(0.11)              | 9.90(0.11)  | 9.89(0.11)  | 9.95(0.11)  | 10.01(0.10) |            |            |
| Wt.% MgO                                                         | 7.69(0.23)               | 7.23(0.21)  | 7.15(0.21)  | 6.98(0.20)  | 5.78(0.19)  |            |            |
| Mg <sub>3</sub> Sb <sub>2</sub>                                  | <i>a=b</i> (Å)           | 4.59654(4)  | 4.58875(4)  | 4.58068(4)  | 4.57246(4)  | 4.56401(3) |            |
|                                                                  | <i>c</i> (Å)             | 7.29940(8)  | 7.28328(8)  | 7.26703(7)  | 7.25059(7)  | 7.23367(7) |            |
|                                                                  | Volume (Å <sup>3</sup> ) | 133.561(2)  | 132.814(2)  | 132.053(2)  | 131.282(2)  | 130.492(2) |            |
|                                                                  | <i>B</i> <sub>iso</sub>  | Mg1         | 3.486(217)  | 3.200(200)  | 2.709(180)  | 1.771(151) | 1.214(132) |
|                                                                  |                          | Mg2         | 2.703(107)  | 2.241(98)   | 1.729(86)   | 1.400(77)  | 0.930(66)  |
| Sb1                                                              |                          | 2.366(24)   | 1.955(22)   | 1.532(19)   | 1.111(16)   | 0.734(13)  |            |

**Table S6.** Rietveld refinement details of synchrotron PXRD data at 300 K for the powdered sample (from the as-synthesized pellet 5).

|                                |           |              |              |
|--------------------------------|-----------|--------------|--------------|
| <i>T</i> (K)                   | 300-start | 300-cooling1 | 300-cooling2 |
| <i>t</i> <sub>exp.</sub> (min) | 5         | 5            | 5            |
| No. of points                  | 7740      | 7732         | 7729         |

|                                                           |                          |             |             |             |            |
|-----------------------------------------------------------|--------------------------|-------------|-------------|-------------|------------|
| No. of reflections<br>(Mg <sub>3</sub> Sb <sub>2</sub> )  | 957                      | 904         | 904         |             |            |
| No. of parameters                                         | 46                       | 53          | 51          |             |            |
| $R_f$ (Mg <sub>3</sub> Sb <sub>2</sub> ) (%)              | 2.13                     | 1.91        | 1.99        |             |            |
| $R_{\text{Bragg}}$ (Mg <sub>3</sub> Sb <sub>2</sub> ) (%) | 11.1                     | 5.28        | 4.86        |             |            |
| $R_p$ (%)                                                 | 8.20                     | 9.61        | 9.61        |             |            |
| $R_{\text{wp}}$ (%)                                       | 10.8                     | 12.0        | 12.0        |             |            |
| $\chi^2$                                                  | 6.86                     | 9.69        | 10.6        |             |            |
| Wt.% Mg <sub>3</sub> Sb <sub>2</sub>                      | 96.53(1.23)              | 90.60(1.19) | 90.29(1.21) |             |            |
| Wt.% Sb                                                   | 0.39(0.04)               | 5.85(0.07)  | 6.14(0.07)  |             |            |
| Wt.% MgO                                                  | 3.08(0.14)               | 3.55(0.15)  | 3.57(0.15)  |             |            |
| Mg <sub>3</sub> Sb <sub>2</sub>                           | $a=b$ (Å)                | 4.56310(10) | 4.56469(7)  | 4.56471(6)  |            |
|                                                           | $c$ (Å)                  | 7.23403(18) | 7.23663(12) | 7.23679(11) |            |
|                                                           | Volume (Å <sup>3</sup> ) | 130.446(5)  | 130.584(3)  | 130.588(3)  |            |
|                                                           | $B_{\text{iso}}$         | Mg1         | 0.607(148)  | 1.103(127)  | 1.045(129) |
|                                                           |                          | Mg2         | 0.676(71)   | 0.982(64)   | 0.950(65)  |
|                                                           |                          | Sb1         | 0.624(16)   | 0.753(13)   | 0.728(13)  |

**Table S7.** Rietveld refinement details of in-house *in situ* PXRD data after cooling down to RT for the powdered samples (from pellets 5 and 6).

| Sample                                                    | Powdered sample (from pellet 5) | Powdered sample (from pellet 6) |             |
|-----------------------------------------------------------|---------------------------------|---------------------------------|-------------|
| $T$ (K)                                                   | 308                             | 308                             |             |
| $t_{\text{exp}}$ (min)                                    | 30                              | 30                              |             |
| No. of points                                             | 8995                            | 8995                            |             |
| No. of reflections<br>(Mg <sub>3</sub> Sb <sub>2</sub> )  | 56                              | 58                              |             |
| No. of parameters                                         | 8                               | 8                               |             |
| $R_f$ (Mg <sub>3</sub> Sb <sub>2</sub> ) (%)              | 9.21                            | 13.2                            |             |
| $R_{\text{Bragg}}$ (Mg <sub>3</sub> Sb <sub>2</sub> ) (%) | 9.79                            | 14.1                            |             |
| $R_p$ (%)                                                 | 25.1                            | 29.4                            |             |
| $R_{\text{wp}}$ (%)                                       | 32.3                            | 44.2                            |             |
| $\chi^2$                                                  | 17.9                            | 35.7                            |             |
| Wt.% Mg <sub>3</sub> Sb <sub>2</sub>                      | 97.46(0.85)                     | 98.89(1.17)                     |             |
| Wt.% Sb                                                   | 2.54(0.08)                      | 1.11(0.09)                      |             |
| Mg <sub>3</sub> Sb <sub>2</sub>                           | $a=b$ (Å)                       | 4.55827(10)                     | 4.55876(13) |
|                                                           | $c$ (Å)                         | 7.22620(20)                     | 7.22614(28) |
|                                                           | Volume (Å <sup>3</sup> )        | 130.029(6)                      | 130.056(7)  |

**Table S8.** The nominal and actual compositions measured by SEM-EDS for the pellets 2 and 4. As the Ag doping content is close to the detection limit of SEM-EDS, only the actual compositions of Mg and Sb can be used for discussion. For major components (Mg and Sb), the combined errors



of SEM-EDS also limit the precision of the analysis results to  $\pm 2\%$ . As can be seen in this table, there are no significant differences in the compositions of Mg and Sb among the EDS measurements, suggesting that the sample compositions are not changed after heat treatment.

| Compositions (at.%)                                                   |          | Pellet 2<br>(as-synthesized) | Pellet 2<br>(after Hall<br>measurements) | Pellet 2<br>(after Hall<br>measurements<br>& surface<br>polished) | Pellet 4<br>(as-synthesized) |              | Pellet 4<br>(after heat<br>treatment) |              |              |
|-----------------------------------------------------------------------|----------|------------------------------|------------------------------------------|-------------------------------------------------------------------|------------------------------|--------------|---------------------------------------|--------------|--------------|
|                                                                       |          |                              |                                          |                                                                   | Top                          | Bottom       | Top                                   | Bottom       |              |
| Nominal<br>(Mg <sub>2.985</sub> Ag <sub>0.015</sub> Sb <sub>2</sub> ) | Mg       | 59.7                         |                                          |                                                                   |                              |              |                                       |              |              |
|                                                                       | Sb       | 40                           |                                          |                                                                   |                              |              |                                       |              |              |
|                                                                       | Ag       | 0.3                          |                                          |                                                                   |                              |              |                                       |              |              |
| Actual                                                                | Region 1 | Mg                           | 52.49                                    | 53.54                                                             | 51.04                        | 54.05        | 54.16                                 | 54.30        | 55.08        |
|                                                                       |          | Sb                           | 47.00                                    | 45.66                                                             | 48.46                        | 45.41        | 45.25                                 | 44.94        | 44.33        |
|                                                                       |          | Ag                           | 0.51                                     | 0.80                                                              | 0.50                         | 0.55         | 0.59                                  | 0.76         | 0.59         |
|                                                                       | Region 2 | Mg                           | 52.41                                    | 53.79                                                             | 51.34                        | 51.99        | 53.25                                 | 53.78        | 54.42        |
|                                                                       |          | Sb                           | 47.12                                    | 45.36                                                             | 48.00                        | 47.25        | 46.29                                 | 45.64        | 44.84        |
|                                                                       |          | Ag                           | 0.47                                     | 0.85                                                              | 0.65                         | 0.75         | 0.46                                  | 0.58         | 0.74         |
|                                                                       | Region 3 | Mg                           | 52.15                                    | 54.51                                                             | 51.41                        | 52.31        | 53.38                                 | 54.51        | 55.20        |
|                                                                       |          | Sb                           | 47.28                                    | 44.75                                                             | 48.09                        | 47.16        | 46.03                                 | 44.84        | 44.21        |
|                                                                       |          | Ag                           | 0.57                                     | 0.74                                                              | 0.50                         | 0.53         | 0.59                                  | 0.65         | 0.59         |
|                                                                       | Region 4 | Mg                           | 52.75                                    | 53.18                                                             | 51.97                        | 52.30        | 52.89                                 | 54.18        | 55.11        |
|                                                                       |          | Sb                           | 46.80                                    | 45.81                                                             | 47.56                        | 47.30        | 46.60                                 | 45.19        | 44.29        |
|                                                                       |          | Ag                           | 0.45                                     | 1.01                                                              | 0.47                         | 0.40         | 0.51                                  | 0.63         | 0.60         |
|                                                                       | Region 5 | Mg                           | 52.13                                    | 53.47                                                             | 51.06                        | 52.58        | 52.80                                 | 54.11        | 55.52        |
|                                                                       |          | Sb                           | 47.48                                    | 45.67                                                             | 48.29                        | 46.96        | 46.63                                 | 45.29        | 43.90        |
|                                                                       |          | Ag                           | 0.39                                     | 0.87                                                              | 0.66                         | 0.46         | 0.57                                  | 0.60         | 0.58         |
|                                                                       | Average  | Mg                           | <b>52.39</b>                             | <b>53.70</b>                                                      | <b>51.36</b>                 | <b>52.65</b> | <b>53.30</b>                          | <b>54.18</b> | <b>55.07</b> |
|                                                                       |          | Sb                           | <b>47.14</b>                             | <b>45.45</b>                                                      | <b>48.08</b>                 | <b>46.82</b> | <b>46.16</b>                          | <b>45.18</b> | <b>44.31</b> |
|                                                                       |          | Ag                           | <b>0.48</b>                              | <b>0.85</b>                                                       | <b>0.56</b>                  | <b>0.54</b>  | <b>0.54</b>                           | <b>0.64</b>  | <b>0.62</b>  |

**Table S9.** The nominal and actual compositions measured by SEM-EDS for pellet 5 after in-house *in situ* PXRD measurements.

| Compositions (at.%)                          |          | Top side of Mg <sub>3.5</sub> Sb <sub>2</sub> pellet |       |
|----------------------------------------------|----------|------------------------------------------------------|-------|
| Nominal (Mg <sub>3.5</sub> Sb <sub>2</sub> ) | Mg       | 63.64                                                |       |
|                                              | Sb       | 36.36                                                |       |
| Actual                                       | Region 1 | Mg                                                   | 55.19 |
|                                              |          | Sb                                                   | 44.81 |
|                                              | Region 2 | Mg                                                   | 56.58 |
|                                              |          | Sb                                                   | 43.42 |
|                                              | Region 3 | Mg                                                   | 56.04 |
|                                              |          | Sb                                                   | 43.96 |
|                                              | Region 4 | Mg                                                   | 56.24 |
| Sb                                           |          | 43.76                                                |       |
| Region 5                                     | Mg       | 56.73                                                |       |
|                                              | Sb       | 43.27                                                |       |
| Region 6                                     | Mg       | 56.48                                                |       |
|                                              | Sb       | 43.52                                                |       |
| Average                                      | Mg       | <b>56.21</b>                                         |       |
|                                              | Sb       | <b>43.79</b>                                         |       |

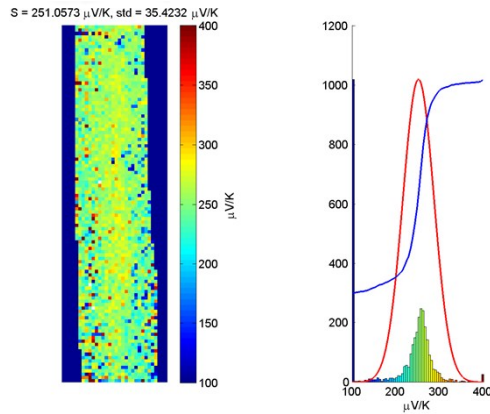

**Fig. S1.** Seebeck coefficient map and histogram from a PSM scan over the cross section of the as-synthesized pellet 2.

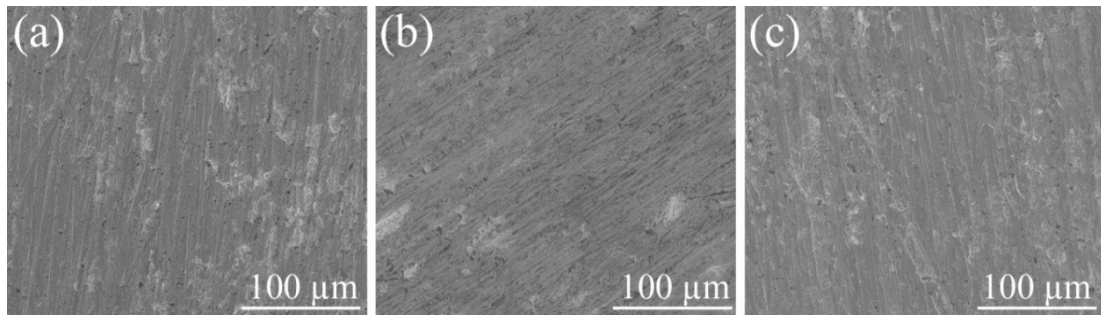

**Fig. S2.** SEM images of the surface (pellet 2): (a) without heat history, (b) after Hall measurements (the surface was not polished) and (c) after Hall measurements (the surface was polished).

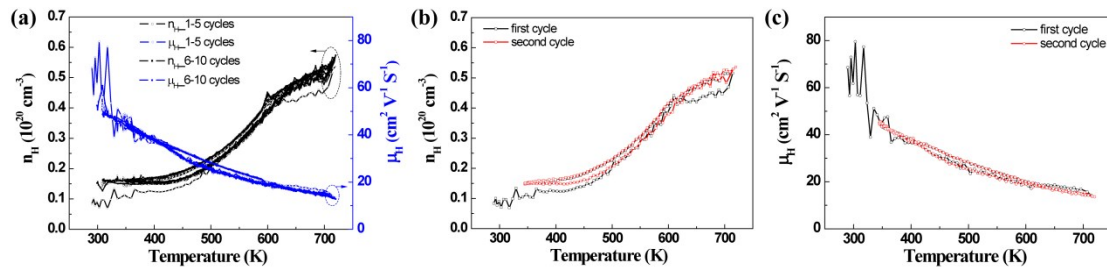

**Fig. S3.** (a) Temperature dependent Hall carrier concentration and Hall mobility for the total 10 cycles. (b) and (c) show the temperature dependence of Hall carrier concentration and Hall mobility in the first two cycles, respectively.

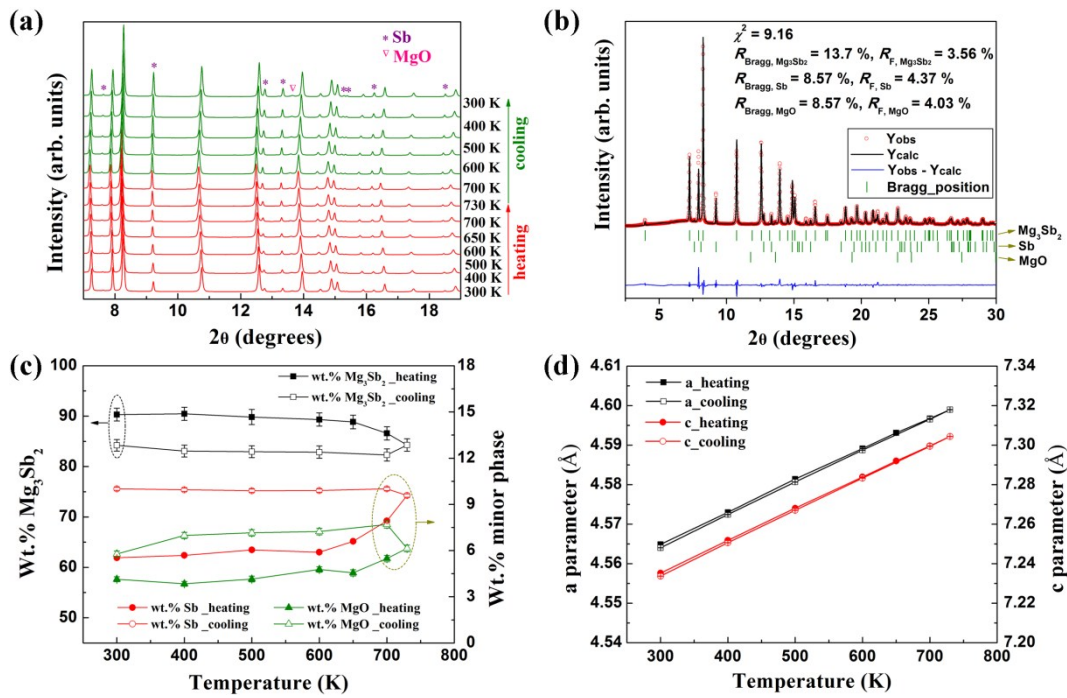

**Fig. S4.** (a) Multi-temperature synchrotron PXRD patterns, (b) the calculated and observed diffraction patterns at 300 K, (c) weight fractions of the  $\text{Mg}_3\text{Sb}_2$ , Sb and MgO phases, and (d) unit cell parameters of the  $\text{Mg}_3\text{Sb}_2$  phase for the powdered sample (from pellet 2) after in-house powder *in situ* PXRD measurements. In (c) and (d), the error bars are smaller than the symbols.

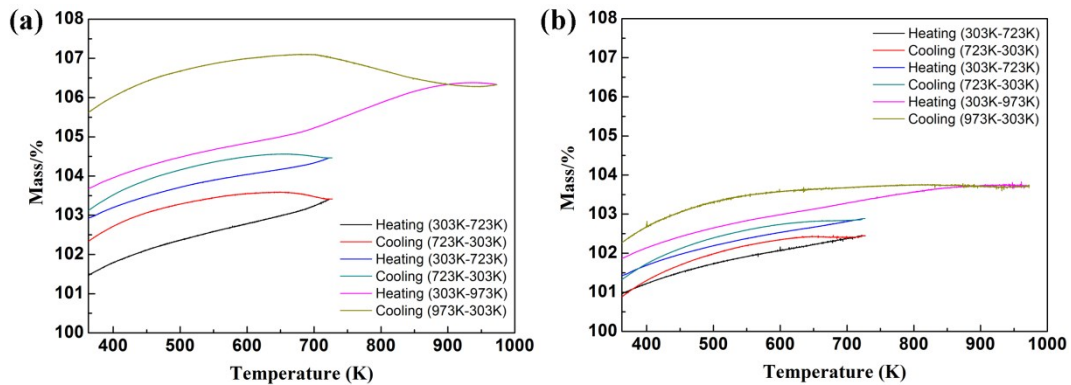

**Fig. S5.** TG data for the powdered samples (a) from pellet 2 before heat treatment and (b) from pellet 3 after all the HT thermoelectric properties measurements.
